# Supplementary material for: The molecular mechanism of cell cycle arrest in the Bursa of Fabricius in chick exposed to Aflatoxin B1
Source: PubMed Central journal article supplement (PMC5789014; doi:10.1038/s41598-018-20164-z), 2018-01-29
Supplement: 41598_2018_20164_MOESM1_ESM.pdf [file 41598_2018_20164_MOESM1_ESM.pdf]

# **The molecular mechanism of cell cycle arrest in the Bursa of**

## **Fabricius in chick exposed to Aflatoxin B<sub>1</sub>**

Ping Hu<sup>1, 2, +</sup>, Zhicai Zuo<sup>1, 2, +</sup>, Hang Li<sup>1, 2, +</sup>, Fengyuan Wang<sup>1, 2, +</sup>, Xi Peng<sup>3, \*</sup>, Jing Fang<sup>1, 2, \*</sup>, Hengmin Cui<sup>1, 2</sup>, Caixia Gao<sup>1, 2</sup>, Hetao Song<sup>1, 2</sup>, Yi Zhou<sup>4</sup> & Zhengli Chen<sup>2</sup>

<sup>1</sup> Key Laboratory of Animal Diseases and Environmental Hazards of Sichuan Province, College of Veterinary Medicine, Sichuan Agricultural University, Chengdu, Sichuan 611130, PR China;

<sup>2</sup> College of Veterinary Medicine, Sichuan Agricultural University, Chengdu, Sichuan 611130, PR China;

<sup>3</sup> College of Life Sciences, China West Normal University, Nanchong, Sichuan 637002, PR China

<sup>4</sup> Life science department, Sichuan Agricultural University, Yaan, Sichuan 625014, PR China

<sup>+</sup> These authors contributed equally to this study.

<sup>\*</sup> Correspondence and requests for materials should be addressed to: J. F. (email: fangjing4109@163.com) or X. P. (email: pengxi197313@163.com)

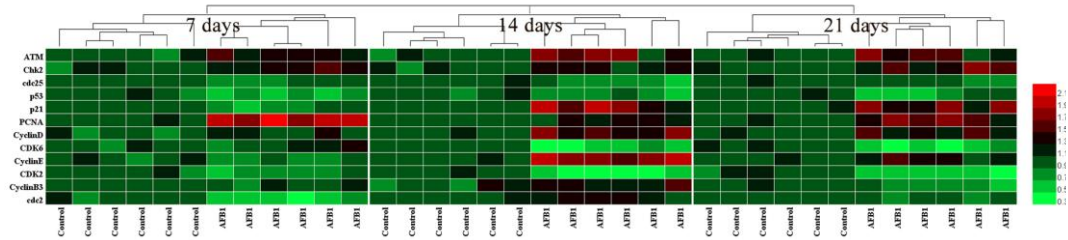

**Supplementary Figure S1.** Hierarchical cluster of gene expression data ( $2^{-\Delta\Delta C_t}$ ) were analyzed by using HemI 1.0 software. Green boxes indicate lower expression than the control group expression and red boxes depict higher expression. (Green: low expression; Red: high expression;  $n = 6$  for each group.)

## Amplification

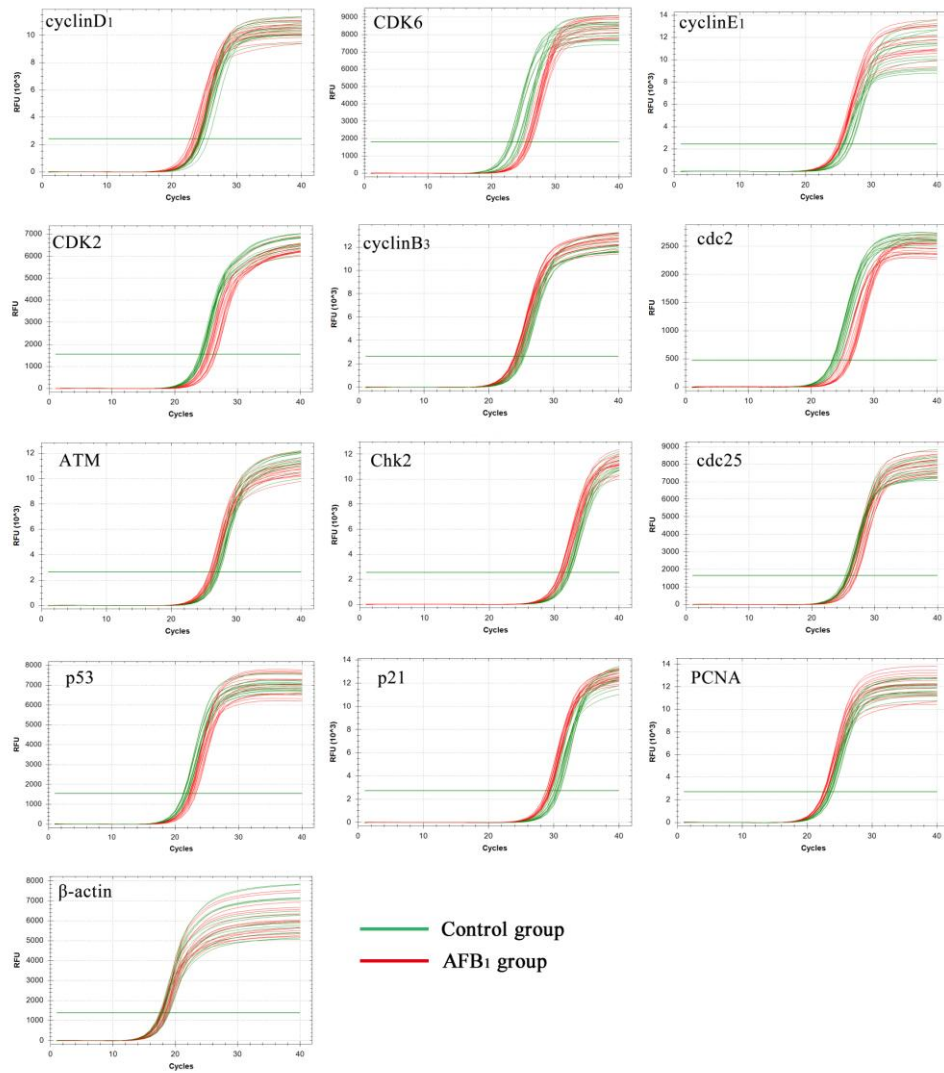

**Supplementary Figure S2.** Representatives of amplification curves of cell cycle-related genes (cyclin D<sub>1</sub>, CDK6, cyclin E<sub>1</sub>, CDK2, cyclin B<sub>3</sub> and cdc2, ATM, Chk2, cdc25, p53 and p21) and reference gene of chicken ( $\beta$ -actin) from the control group and the AFB<sub>1</sub> group at 14 days of age.
